# Supplementary material for: A Novel Transfer Learning Approach to Enhance Deep Neural Network Classification of Brain Functional Connectomes
Source: PubMed Central journal article supplement (PMC6066582; doi:10.3389/fnins.2018.00491), 2018-07-24

**Supplemental Table 1.** Top 10 discriminative FC features for DNN and DTL-NN models of UCLA site.

| <b>Top 10 Discriminative FC features of UCLA site</b> |              |                                |              |
|-------------------------------------------------------|--------------|--------------------------------|--------------|
| <b>DNN</b>                                            |              |                                |              |
| <b>Brain Region A</b>                                 | <b>Abbr.</b> | <b>Brain Region B</b>          | <b>Abrr.</b> |
| Hippocampus right                                     | HIP-R        | Inferior occipital gyrus left  | IOG-L        |
| Posterior cingulate gyrus left                        | PCG-L        | Hippocampus right              | HIP-R        |
| ParaHippocampal gyrus left                            | PHG-L        | Inferior occipital gyrus left  | IOG-L        |
| Middle temporal gyrus right                           | MTG-R        | Temporal pole (middle) right   | TPOmid-R     |
| Olfactory left                                        | OLF-L        | Precuneus right                | PCUN-R       |
| Posterior cingulate gyrus left                        | PCG-L        | Supramarginal gyrus right      | SMG-R        |
| Superior occipital gyrus left                         | SOG-L        | Inferior occipital gyrus right | IOG-R        |
| Olfactory right                                       | OLF-R        | Inferior occipital gyrus right | IOG-R        |
| Superior frontal gyrus (medial) left                  | SFGmed-L     | Amygdala right                 | AMYG-R       |
| Anterior cingulate gyrus left                         | ACG-L        | Precuneus right                | PCUN-R       |
| <b>DTL-NN</b>                                         |              |                                |              |
| <b>Brain Region A</b>                                 | <b>Abbr.</b> | <b>Brain Region B</b>          | <b>Abrr.</b> |
| Superior parietal gyrus left                          | SPG-L        | Precuneus right                | PCUN-R       |
| Superior occipital gyrus left                         | SOG-L        | Inferior occipital gyrus right | IOG-R        |
| Superior frontal gyrus (dorsal) right                 | SFGdor-R     | Superior occipital gyrus right | SOG-R        |
| Amygdala left                                         | AMYG-L       | Superior temporal gyrus right  | STG-R        |
| Superior frontal gyrus (dorsal) right                 | SFGdor-R     | Superior occipital gyrus left  | SOG-L        |
| Superior occipital gyrus left                         | SOG-L        | Paracentral lobule left        | PCL-L        |
| Posterior cingulate gyrus left                        | PCG-L        | Superior parietal gyrus left   | SPG-L        |
| Superior parietal gyrus left                          | SPG-L        | Angular gyrus right            | ANG-R        |
| Middle cingulate gyrus right                          | MCG-R        | Paracentral lobule right       | PCL-R        |
| Superior occipital gyrus left                         | SOG-L        | Precuneus left                 | PCUN-L       |

**Supplemental Table 2.** Top 10 discriminative FC features for DNN and DTL-NN models of USM site.

| <b>Top 10 Discriminative FC features of USM site</b> |              |                                          |              |
|------------------------------------------------------|--------------|------------------------------------------|--------------|
| <b>DNN</b>                                           |              |                                          |              |
| <b>Brain Region A</b>                                | <b>Abbr.</b> | <b>Brain Region B</b>                    | <b>Abbr.</b> |
| Superior frontal gyrus (dorsal) right                | SFGdor-R     | Inferior frontal gyrus (opercular) right | IFGoperc-R   |
| Middle frontal gyrus left                            | MFG-L        | Thalamus left                            | THA-L        |
| Orbitofrontal cortex (middle) right                  | ORBmid-R     | Calcarine cortex right                   | CAL-R        |
| Inferior frontal gyrus (triangular) right            | IFGtriang-R  | Rectus gyrus right                       | REC-R        |
| Putamen left                                         | PUT-L        | Inferior temporal gyrus left             | ITG-L        |
| Inferior parietal lobule left                        | IPL-L        | Putamen left                             | PUT-L        |
| Orbitofrontal cortex (middle) right                  | ORBmid-R     | Amygdala right                           | AMYG-R       |
| Orbitofrontal cortex (middle) left                   | ORBmid-L     | Posterior cingulate gyrus right          | PCG-R        |
| Paracentral lobule left                              | PCL-L        | Thalamus right                           | THA-R        |
| Rolandic operculum right                             | ROL-R        | Postcentral gyrus right                  | PoCG-R       |
| <b>DTL-NN</b>                                        |              |                                          |              |
| <b>Brain Region A</b>                                | <b>Abbr.</b> | <b>Brain Region B</b>                    | <b>Abbr.</b> |
| Putamen left                                         | PUT-L        | Inferior temporal gyrus left             | ITG-L        |
| Superior parietal gyrus left                         | SPG-L        | Precuneus right                          | PCUN-R       |
| Superior occipital gyrus left                        | SOG-L        | Inferior occipital gyrus right           | IOG-R        |
| Superior frontal gyrus (dorsal) right                | SFGdor-R     | Superior occipital gyrus right           | SOG-R        |
| Supplementary motor area right                       | SMA-R        | Middle occipital gyrus left              | MOG-L        |
| Paracentral lobule right                             | PCL-R        | Thalamus left                            | THA-L        |
| Superior frontal gyrus (medial) right                | SFGmed-R     | Middle cingulate gyrus left              | MCG-L        |
| Superior occipital gyrus right                       | SOG-R        | Fusiform gyrus left                      | FFG-L        |
| Precentral gyrus right                               | PreCG-R      | Inferior parietal lobule left            | IPL-L        |
| Precentral gyrus right                               | PreCG-R      | Angular gyrus left                       | ANG-L        |

**Supplemental Table 3.** Top 10 discriminative FC features for DNN and DTL-NN models of LEUVEN site.

| <b>Top 10 Discriminative FC features of LEUVEN site</b> |              |                                |              |
|---------------------------------------------------------|--------------|--------------------------------|--------------|
| <b>DNN</b>                                              |              |                                |              |
| <b>Brain Region A</b>                                   | <b>Abbr.</b> | <b>Brain Region B</b>          | <b>Abbr.</b> |
| Precentral gyrus left                                   | PreCG-L      | Superior parietal gyrus right  | SPG-R        |
| Supplementary motor area left                           | SMA-L        | Paracentral lobule left        | PCL-L        |
| Postcentral gyrus left                                  | PoCG-L       | Superior parietal gyrus right  | SPG-R        |
| Postcentral gyrus right                                 | PoCG-R       | Paracentral lobule right       | PCL-R        |
| Posterior cingulate gyrus left                          | PCG-L        | Caudate right                  | CAU-R        |
| Precentral gyrus left                                   | PreCG-L      | Precentral gyrus right         | PreCG-R      |
| Anterior cingulate gyrus left                           | ACG-L        | Paracentral lobule left        | PCL-L        |
| Superior frontal gyrus (dorsal) left                    | SFGdor-L     | Paracentral lobule left        | PCL-L        |
| Anterior cingulate gyrus left                           | ACG-L        | Paracentral lobule right       | PCL-R        |
| Anterior cingulate gyrus right                          | ACG-R        | Postcentral gyrus left         | PoCG-L       |
| <b>DTL-NN</b>                                           |              |                                |              |
| <b>Brain Region A</b>                                   | <b>Abbr.</b> | <b>Brain Region B</b>          | <b>Abbr.</b> |
| Anterior cingulate gyrus left                           | ACG-L        | Paracentral lobule right       | PCL-R        |
| Supplementary motor area left                           | SMA-L        | Paracentral lobule left        | PCL-L        |
| Superior occipital gyrus left                           | SOG-L        | Inferior occipital gyrus right | IOG-R        |
| Superior frontal gyrus (dorsal) left                    | SFGdor-L     | Heschl gyrus right             | HES-R        |
| Orbitofrontal cortex (middle) left                      | ORBmid-L     | Lingual gyrus right            | LING-R       |
| Orbitofrontal cortex (superior) left                    | ORBsup-L     | Precuneus right                | PCUN-R       |
| Middle cingulate gyrus right                            | MCG-R        | Paracentral lobule right       | PCL-R        |
| Anterior cingulate gyrus right                          | ACG-R        | Paracentral lobule right       | PCL-R        |
| Anterior cingulate gyrus left                           | ACG-L        | Paracentral lobule left        | PCL-L        |
| Inferior frontal gyrus (opercular) right                | IFGoperc-R   | Temporal pole (middle) right   | TPOmid-R     |

**Supplemental Figure 1.** FC maps examples before and after site bias normalization at UM site

**(A)** Before site bias normalization

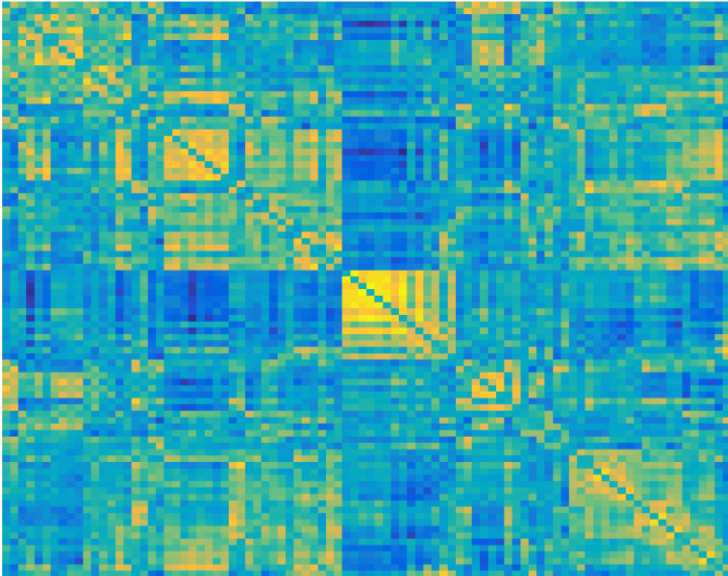

**(B)** After site bias normalization

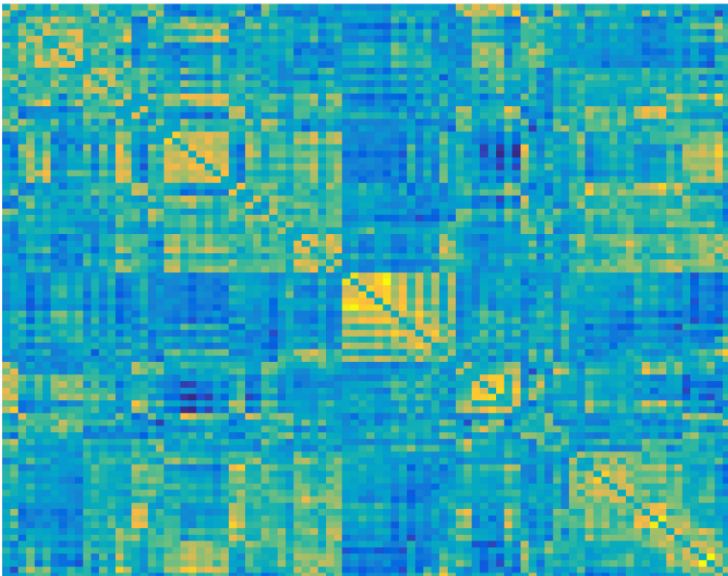

Supplement: Data_Sheet_1.pdf [file Data_Sheet_1.pdf]
