# Supplementary material for: A Novel Transfer Learning Approach to Enhance Deep Neural Network Classification of Brain Functional Connectomes
Source: Front Neurosci. 2018 Jul 24;12:491. doi: 10.3389/fnins.2018.00491 (PMC6066582; doi:10.3389/fnins.2018.00491)
Supplement: Supplementary file 2 [file Data_Sheet_2.docx]

**Algorithm 1**

| **Learning Algorithm: DTL-NN** |
| --- |
| **Input 1:** Healthy data  **Input 2:** Task labeled data |
| **Output:** DTL-NN model |
| *# offline learning*  ***for k=1:L layers of SSAE*** |
| ***Minimize*** |
| ***End*** |
| *# prior knowledge aided classification*  ***Calculate high-level features for targeted subjects***  ***Supervised learning of softmax regression by optimizing*** |
| ***Fine tuning of the DTL-NN with task data***  ***Return*** |
